1 ***Salmonella* ItaR responds to itaconate in macrophage**

2 *Hersch SJ<sup>†</sup> and Navarre WW\**

3 Department of Molecular Genetics, University of Toronto, Toronto, Canada

4

5 †, Current address: Department of Ecosystem and Public Health, University of Calgary, Calgary,

6 Canada

7 \*, For correspondence: [William.navarre@utoronto.ca](mailto:William.navarre@utoronto.ca)

## 8 **Abstract**

9           Itaconate is a dicarboxylic acid that is able to inhibit the isocitrate lyase enzyme of the  
10 bacterial glyoxylate shunt. Activated macrophage have been shown to produce itaconate,  
11 suggesting that these immune cells may employ this metabolite as a weapon against invading  
12 bacteria. Here we demonstrate that itaconate can exhibit bactericidal effects under acidic  
13 conditions resembling the pH of a macrophage phagosome. In parallel, successful pathogens  
14 including *Salmonella* have acquired a genetic operon encoding itaconate degradation proteins,  
15 which are induced heavily in macrophage. We characterize the regulation of this operon by the  
16 neighbouring gene, *itaR*, in specific response to itaconate. Moreover, we develop an itaconate  
17 biosensor based on the operon promoter that can detect itaconate in a semi-quantitative  
18 manner and, when combined with the *itaR* gene, is sufficient for itaconate-regulated expression  
19 in *E. coli*. Using this biosensor with fluorescence microscopy, we observe bacteria responding to  
20 itaconate in the phagosomes of macrophage and provide additional evidence that interferon- $\gamma$   
21 stimulates macrophage itaconate synthesis and that mouse macrophage produce substantially  
22 more itaconate than human cells. In summary, we examine the role of itaconate as an  
23 antibacterial metabolite in mouse and human macrophage, characterize the regulation of  
24 *Salmonella's* defense against it, and develop it as a convenient itaconate biosensor and  
25 inducible promoter system.

26

## 27 **Importance**

28           In response to invading bacteria, immune cells can produce a molecule called itaconate,  
29 which can inhibit microbial metabolism. Here we show that itaconate can also directly kill

30 *Salmonella* when combined with moderate acidity, further supporting itaconate's role as an  
31 antibacterial weapon. We also discover how *Salmonella* recognizes itaconate and activates a  
32 defense to degrade it, and we harness this response to make a biosensor that detects the  
33 presence of itaconate. This biosensor is versatile, working in *Salmonella* or harmless *E. coli*, and  
34 can detect itaconate quantitatively in the environment and in immune cells. By understanding  
35 how immune cells kill bacteria and how the microbes defend themselves, we can better  
36 develop novel antibiotics to inhibit pathogens such as *Salmonella*.

37

## 38 **Introduction**

39 The mammalian immune system includes a multitude of weapons to defend against  
40 invading microbes and successful pathogens have evolved a plethora of mechanisms to evade,  
41 manipulate, or even benefit from these immune responses. One such pathogen, *Salmonella*  
42 *enterica* serovar Typhimurium (hereafter referred to as *Salmonella*), has acquired a number of  
43 *Salmonella* pathogenicity islands (SPI) that support its survival inside of a host organism. For  
44 instance, *Salmonella* employs SPI-1 to invade non-phagocytic cells, and SPI-2 allows the bacteria  
45 to survive intracellularly – including in macrophage – which is important for *Salmonella*  
46 virulence (1-4). These traits allow *Salmonella* to invade the gut epithelium and induce intestinal  
47 inflammation resulting in the characteristic gastroenteritis disease. Moreover, the induced  
48 inflammation is not merely a threat that *Salmonella* must survive, but it has adapted to thrive in  
49 the oxidative environment of the inflamed intestine and utilize inflammation-derived  
50 metabolites to outcompete resident microbiota (5-7).

51           Itaconate is a metabolite originally recognized in fungal species such as *Aspergillus*  
52 *terreus* and produced commercially for use in polymer industries (8, 9). A dicarboxylic acid  
53 comprised of succinate with a methylene group, itaconate is able to act as an inhibitor of the  
54 glyoxylate shunt enzyme AceA (isocitrate lyase) and can inhibit bacterial growth on carbon  
55 sources that require this pathway, such as acetate (10-12). Interestingly, it has been  
56 demonstrated that activated macrophage employ the IRG1 protein to produce itaconate, with  
57 higher concentrations being produced by mouse macrophage than human (12-14). Moreover,  
58 IRG1 closely associated with vesicles containing *Legionella pneumophila* and itaconate showed  
59 bactericidal activity against this pathogen *in vitro* (14). Itaconate was also found to inhibit  
60 *Salmonella* growth by reducing media pH and itaconate levels correlated with splenomegaly in  
61 *Salmonella*-infected mice (15). Cumulatively, these works suggest that itaconate acts as a  
62 weaponized metabolite that the immune system employs to inhibit or kill invading bacteria.

63           If itaconate is an antibacterial metabolite functioning for the immune system then it  
64 follows logically that successful pathogens must have methods to evade its effects. Indeed a  
65 genetic operon in *Yersinia* (*ripABC* for ‘required for intracellular proliferation’) encodes proteins  
66 catalyzing the degradation of itaconate into pyruvate and acetyl-CoA (16). This operon is not  
67 restricted to *Yersinia* and a variety of other pathogens encode homologs. These include the  
68 *Salmonella* genes STM3120-STM3118 that, with STM3117, comprise an operon in SPI-13 that  
69 we refer to as the ‘itaconate response operon’ (IRO). Interestingly, the IRO genes of *Salmonella*  
70 have been shown to be induced heavily in macrophage but not under any other condition  
71 tested, supporting a role in degrading macrophage-produced itaconate (17-19). High  
72 throughput screens have suggested that genes from this operon are important for *Salmonella*

73 survival in mice (20-22). Furthermore, it has also been shown that SPI-13 is present in generalist  
74 but not human-restricted serovars of *Salmonella*, possibly due to reduced itaconate synthesis in  
75 human cells (23).

76 In this work we show that itaconate is bactericidal at low but not neutral pH and  
77 elucidate the regulation of the *Salmonella* IRO and its induction in mouse and human  
78 macrophage. We show that the promoter of the IRO ( $P_{itac}$ ) is specifically induced by itaconate  
79 and that the LysR family transcriptional regulator encoded by the upstream gene, STM3121  
80 (which we propose to name *itaR* for ‘itaconate regulator’), is both necessary and sufficient for  
81 this induction. Furthermore, using  $P_{itac}$  with a GFP reporter, we develop a semi-quantitative  
82 itaconate biosensor and employ it to show that the IRO is induced heavily in the J774 mouse  
83 macrophage cell line but requires interferon- $\gamma$  (IFN- $\gamma$ ) stimulation to show a substantial  
84 response in the THP-1 human macrophage cell line.

85

## 86 **Results**

### 87 *Itaconate is bactericidal at low pH*

88 Previous works have demonstrated that itaconate can inhibit the function of the  
89 glyoxylate shunt enzyme, AceA, and act as a bacteriostatic agent when bacteria rely on carbon  
90 sources such as acetate that require this pathway (10-12). It has also been suggested that  
91 itaconate can inhibit bacteria by influencing media pH and at least one publication has  
92 demonstrated that it can have bactericidal activity (14, 15). To clarify this later phenotype we  
93 hypothesized that the dicarboxylic acid chemistry of itaconate would allow it to act in a  
94 bactericidal fashion at low pH by acting as a proton shuttle. In brief, the carboxyl groups of

95 itaconate ( $pK_a = 5.5$  and  $3.8$ ) protonate and lose their charge at lower pH allowing them to  
96 traverse the bacterial membrane and release the protons in the more neutral pH of the  
97 cytoplasm, thereby exacerbating acid stress (Figure 1A).

98 To emulate the intracellular conditions that *Salmonella* may encounter in a *Salmonella*  
99 containing vacuole (SCV) of a macrophage we added itaconate to LPM media and then acidified  
100 to pH 4.4, 5.0, or 5.8 to cover a range from the most acidic to more regular estimates of SCV pH  
101 (24-26). Indeed we found that wild-type *Salmonella* showed a 1000-fold decrease in survival  
102 after 3h hours at pH 4.4 with itaconate (Figure 1B). This lethality was alleviated at higher pH  
103 and also occurred using a similar dicarboxylic acid, succinate. Importantly, the bactericidal  
104 effect was also dependent on the presence of itaconate (or succinate) and pH 4.4 LPM did not  
105 kill *Salmonella* in the absence of a dicarboxylic acid (Figure S1A). Interestingly, deletion of the  
106 entire IRO (STM3120-STM3117) or *aceA* had no effect, but deletion of the general stress  
107 response sigma factor, RpoS ( $\sigma^S$ ), exacerbated *Salmonella's* sensitivity at both pH 4.4 and 5.0  
108 (Figures 1C and S1B). Cumulatively, these data demonstrate that itaconate or other dicarboxylic  
109 acids can act in a bactericidal fashion under acidic conditions by exacerbating acid stress.

110

111 *The Salmonella IRO is induced specifically by itaconate in an itaR-dependent manner*

112 The *Salmonella* pathogenicity island-13 includes genes encoding Ccl (STM3120), Ich  
113 (STM3119) and Ict (STM3118), whose homologs have been demonstrated to degrade itaconate  
114 into pyruvate and acetyl-CoA (16). This operon, which we refer to as the itaconate response  
115 operon (IRO), appears to also include the STM3117 gene (encoding a predicted glyoxalase-  
116 domain containing protein) and is adjacent to the STM3121 (*itaR*) gene on the reverse DNA

117 strand (Figure 2). In light of its potential to degrade itaconate, we hypothesized that this  
118 metabolite may act as an inducer of IRO expression. To assess this, we constructed a plasmid-  
119 borne fusion of the operon's promoter ( $P_{itac}$ ) to superfolder GFP (sfGFP) as a reporter. Indeed,  
120 we found that the  $P_{itac}$  promoter was induced highly in the presence of itaconate and this  
121 response was entirely dependent on the presence of ItaR as neither a *Salmonella itaR* deletion  
122 mutant nor the same reporter plasmid in *E. coli* K12 (which does not encode *itaR*) showed  
123 induction (Figure 3A). In contrast, when the *itaR* gene was included on the reporter plasmid,  
124 itaconate-induced  $P_{itac}$  expression was restored in both the  $\Delta itaR$  *Salmonella* strain and in *E.*  
125 *coli*. These data not only demonstrate that  $P_{itac}$  is induced in response to itaconate, but also that  
126 the neighbouring gene, *itaR*, is both necessary and sufficient for this induction.

127         To assess if the IRO promoter is induced specifically by itaconate, we examined  
128 induction of the  $pP_{itac}$  reporter in media supplemented with a panel of similar metabolites.  
129 While mesaconate, citramalate and methylsuccinate (in order of induction strength) slightly  
130 induced expression, induction by itaconate was drastically more pronounced, suggesting that it  
131 is the principal inducer (Figure 3B). Notably, similar results were obtained in complex media  
132 (LB) and in MOPS minimal media with either glucose or glycerol as a carbon source, suggesting  
133 that the induction only requires itaconate and not additional factors in the media (Figure S2).  
134 Furthermore, induction by itaconate occurred in a dose dependent manner indicating that the  
135 reporter can be used to semi-quantitatively assess itaconate concentrations encountered by  
136 the bacteria (Figure S3).

137

138 *The Salmonella IRO does not significantly contribute to survival in a mouse macrophage cell line*

139           The inhibitory effect of itaconate on AceA, its bactericidal activity under acidic  
140 conditions, and the synthesis of itaconate in macrophage combine to support the concept that  
141 these immune cells may be employing itaconate as an antibacterial compound. As a successful  
142 pathogen, *Salmonella* has adapted to survive in activated macrophage and multiple previous  
143 works have examined how IRO genes may influence *Salmonella* survival and virulence (20-23).  
144 In our hands, we found no significant reduction in survival of  $\Delta IRO$  or  $\Delta itaR$  strains in the mouse  
145 J774 macrophage cell line (Figure S4). When the macrophage were pre-stimulated with IFN- $\gamma$ ,  
146 there was a slight reduction in survival relative to wild-type, but this was not significant when  
147 compared to an *aceA* mutant that showed no survival defect. In contrast, a *phoP* mutant  
148 control was readily inhibited by the macrophage even without IFN- $\gamma$ .

149  
150 *Salmonella encounter itaconate in the phagosomes of mouse and IFN- $\gamma$ -stimulated human*  
151 *macrophage*

152           Multiple high throughput studies have demonstrated that the IRO genes are induced  
153 heavily in mouse macrophage (17-19). Additional studies have identified itaconate in both  
154 mouse and human macrophage but the mouse cells appear to produce significantly more of the  
155 metabolite (12, 13). Furthermore, it has been demonstrated that interferon- $\beta$  (IFN- $\beta$ ) and IFN- $\gamma$   
156 can stimulate itaconate production in mouse macrophage (14, 27-29).

157           To examine itaconate levels encountered by intracellular bacteria inside macrophage,  
158 we employed our  $P_{itac}$ -sfGFP reporter plasmid as a biosensor. By including a constitutively  
159 expressed mCherry gene on the same plasmid, we could microscopically observe individual  
160 bacteria inside macrophage and obtain semi-quantitative data by generating a GFP/mCherry



161 fluorescence ratio as an indicator of  $P_{itac}$  induction and accordingly itaconate levels. Using this  
162 system we observed strong induction of the  $P_{itac}$  promoter for wild-type *Salmonella* in J774  
163 mouse macrophage and this signal was absent in the  $\Delta itaR$  control (Figure 4). Furthermore, the  
164 response could also be observed in *E. coli* if ItaR was encoded on the same plasmid,  
165 demonstrating that bacteria that are poorly adapted to intracellular survival also encounter  
166 itaconate in macrophage.

167 In contrast to the mouse cell line, unstimulated human THP-1 macrophage showed  
168 negligible itaconate levels as very few of the bacterial reporters showed any green fluorescence  
169 above background levels (Figure 4). The bacteria did express the constitutive mCherry and  
170 could be observed in the macrophage, suggesting that the lack of green fluorescence was not  
171 due to decreased bacterial survival or protein expression. Intriguingly, the human cells did  
172 appear to synthesize itaconate when stimulated with human IFN- $\gamma$  (M1 activation) leading to  
173 significant green fluorescence of the reporter bacteria in an ItaR-dependent fashion. In  
174 contrast, itaconate levels in THP-1 cells induced with IL-4 and IL-13 (M2 activation) resembled  
175 unstimulated cells (Figure S6).

176

## 177 Discussion

178 In this work we demonstrate that itaconate becomes bactericidal at acidic pH,  
179 suggesting an additional mechanism for itaconate to act as an antibacterial metabolite beyond  
180 inhibition of AceA. Thus, elevated itaconate levels in macrophage may act to inhibit bacterial  
181 metabolism while also exacerbating acid stress on microbes in the phagosome. Protonation of  
182 itaconate under acidic conditions also grant it increased access to the bacterial cytoplasm

183 where de-protonation would trap the charged form close to its AceA target. This organic acid  
184 killing effect has been demonstrated previously, including in a recent work showing propionate  
185 inhibition of *Salmonella* in mice (30, 31). Of note, we also find that bacterial killing occurs with  
186 succinate, a metabolite similar to itaconate that similarly increases in concentration in activated  
187 macrophage (32). Our findings that these dicarboxylic acids can kill *Salmonella* at pH 4.4 but not  
188 higher may contribute to why *Salmonella* manipulates the SCV to maintain a pH closer to 5.0 in  
189 order to avoid this organic acid stress. Moreover, they imply that organic acids such as  
190 itaconate and succinate may contribute to the antibacterial activity of acidified phagosomes.

191 The antibacterial potential of itaconate, its synthesis in activated macrophage, and the  
192 localization of IRG1 to bacteria-containing vacuoles, support its potential role as a weapon  
193 against intracellular bacteria. Here we examined survival of *Salmonella* IRO or *itaR* deletion  
194 strains in the mouse macrophage J774 cell line but saw no significant decrease in survival,  
195 similar to a recent study examining SPI-13 in RAW264.7I macrophage (23). However, in that  
196 work, Espinoza *et al.* discovered that SPI-13 does play a role in *Salmonella* internalization into  
197 mouse – but not human – macrophage (23). Combined with previous works showing reduced  
198 survival of IRO mutants in mice, this operon may play a more significant survival role in the  
199 context of an animal infection (19-22).

200 Here we showed that *Salmonella* responds to itaconate *in vitro* and intracellularly by  
201 strongly inducing an operon encoding itaconate degradation proteins. This response is largely  
202 specific to itaconate and is entirely dependent on the neighbouring gene, STM3121, which we  
203 propose to rename *itaR* for ‘itaconate regulator’. The *itaR* gene product is predicated to be a  
204 LysR family transcriptional regulator, suggesting that itaconate induces IRO expression by

205 interacting directly with the substrate binding domain of ItaR to activate it. Moreover, we find  
206 that ItaR is sufficient for itaconate induction of the  $P_{itac}$  promoter in *E. coli*, demonstrating its  
207 potential as a novel inducible expression system with over 50-fold higher transcription in the  
208 presence of the inexpensive and readily available inducer. A limitation of this expression system  
209 would be a requirement for growth on carbon sources independent of the glyoxylate shunt and  
210 also growth at neutral or alkaline pH, as we demonstrate that itaconate is bactericidal under  
211 acidic conditions. However, for many studies these conditions are met, adding  $P_{itac}$  to the  
212 repertoire of available inducible promoter systems.

213         Using our  $P_{itac}$ -sfGFP itaconate biosensor, we showed a pronounced response in  
214 unstimulated mouse macrophage whereas no induction was observed in the THP-1 human  
215 macrophage cell line without stimulation, suggesting that these cells are not producing  
216 itaconate to the same degree. Interferon has previously been demonstrated to stimulate  
217 itaconate production in mouse macrophage and we found that our biosensor was induced in  
218 human cells stimulated with IFN- $\gamma$  (14, 27-29). Thus, while the human cell line was able to  
219 produce itaconate, it required auxiliary induction to do so and still produced less than the  
220 uninduced mouse macrophage. While it is possible that this reflects an artifact of the cell lines  
221 employed, it aligns well with previous works that quantified itaconate in both mouse and  
222 human cells (12, 13). Furthermore, Espinoza *et al.* recently determined that SPI-13 is abundant  
223 in generalist *Salmonella* serovars but not human-restricted ones (which instead encode SPI-8),  
224 suggesting the hypothesis that human-restricted serovars may not require an IRO because they  
225 do not encounter high levels of itaconate in humans (23).

226           While further work will have to be done to determine if human cells truly produce less  
227 itaconate than other species, itaconate could potentially open the door to novel antimicrobials.  
228 Indeed, a recent study demonstrated that small molecules can inhibit the activity of the IRO  
229 proteins and sensitize *Salmonella* to itaconate inhibition in minimal media (33). Such drugs  
230 could also sensitise other bacteria to itaconate including *Yersinia*, *Pseudomonas* and  
231 *Mycobacteria* species, which also encode an IRO (16, 33). Moreover, if human-restricted  
232 pathogens lack an IRO because human cells truly produce less itaconate, then they are  
233 potentially sensitive to it and itaconate itself could potentially be used as an antimicrobial  
234 against them. Our biosensor could prove invaluable in such studies for determining how much  
235 itaconate the bacteria are encountering, and the self-sufficiency of the biosensor allows it to be  
236 employed in a variety of species, providing added versatility.

237           In summary, here we present data that itaconate can act as a bactericidal metabolite at  
238 acidic but physiologically relevant pH. We identify the regulatory mechanism of an itaconate  
239 response operon in *Salmonella* and employ its promoter as a novel biosensor of relative  
240 itaconate concentrations in macrophage phagosomes. Finally, we provide further evidence that  
241 IFN- $\gamma$  stimulates itaconate synthesis and moreover that human cells produce less of the  
242 metabolite than their mouse equivalents.

243

244

## 245 **Materials and Methods**

246 *Bacterial strains and plasmids*

247 All *Salmonella* strains used in experiments are derivatives of *Salmonella enterica* subsp.  
248 *enterica* serovar Typhimurium (*S. Typhimurium*) strain 14028s. As described previously, lambda  
249 red recombination and subsequent P22 phage transduction was used to generate all of the  
250 gene knockout mutants in this background (34-36). To allow for subsequent recombinations,  
251 the antibiotic resistance cassette was removed from the chromosome using the pCP20 plasmid  
252 encoding FLP recombinase (37). The heat-unstable pCP20 plasmid was eliminated by passaging  
253 overnight at 42°C and loss was confirmed by antibiotic treatment.

254 A reporter fusion of the IRO promoter to sfGFP ( $P_{itac}$ -sfGFP) was generated using Gibson  
255 cloning to insert the 333bp upstream of the STM3120 start codon (thereby including 25bp  
256 upstream of the predicted -35 box and the 5' untranslated region) into the pXG10sf plasmid  
257 (replacing the existing promoter)(38-40). For the reporter construct including *itaR*, the same  
258 region was extended to 1570bp upstream of the STM3120 start codon to include the entire  
259 STM3121 ORF and a predicted transcriptional terminator following it. For fluorescence  
260 microscopy, constitutively expressed (PLtet0-1 promoter) mCherry was inserted into a  
261 transcriptionally independent region of the same plasmid. This variation of the plasmid was  
262 renamed 'independent constitutive mCherry' or pICM.

263

#### 264 *Metabolite induction of $P_{itac}$ assay*

265 Induction of the *Salmonella*  $P_{itac}$  promoter was assessed using a transcriptional fusion to  
266 sfGFP in either the pXG10sf or pICM plasmids. Data from the two plasmids were combined as  
267 the inducible region is identical and the plasmids only differ in the constitutively active mCherry  
268 expressed independently on pICM. Overnight LB cultures were used to inoculate (1/200

269 dilution) either LB or MOPS minimal media containing 0.2% of the indicated carbon source.  
270 Itaconate or other metabolites at neutral pH were supplemented to a concentration of 0.2%. Of  
271 note, for salts and hydrates the final 0.2% concentration reflects the percent of the carbon  
272 source itself; e.g. 0.2% succinate was made as 0.47% sodium succinate (dibasic) hexahydrate.  
273 Growth was conducted in a TECAN Infinite M200 plate reader at 37°C with shaking and OD<sub>600</sub>  
274 and GFP fluorescence (475nm and 511nm excitation and emission wavelengths respectively)  
275 were read every 15 minutes. For clarity, bar graphs show fluorescence at 16h post inoculation.  
276 Chloramphenicol was included in all media at a concentration of 20µg/ml to maintain the  
277 plasmids.

278

#### 279 *Acidified media survival*

280 LPM media was made as described previously (41, 42). Succinate or itaconate were  
281 added to 0.4% and the pH was then adjusted to 4.4, 5.0 or 5.8 as indicated. LB overnight  
282 cultures were resuspended in acidified media to an OD of 0.1 and incubated in a 37°C water  
283 bath. At time points, samples were taken, serial diluted and plated for colony forming units  
284 (CFU).

285

#### 286 *Intra-macrophage survival*

287 The THP-1 human monocyte cell line and the J774 mouse macrophage cell line were  
288 maintained in RPMI Medium 1640 (with L-glutamine) supplemented with 10% FBS and 1%  
289 Glutamax, and grown at 37°C and 5% CO<sub>2</sub>. THP-1 cells were seeded in 96-well plates at 50,000  
290 per well with 50nM PMA (phorbol 12-myristate 13-acetate) added to induce differentiation to

291 adherent macrophage. After 48h, media was replaced with no-PMA growth media overnight  
292 with 100 U/ml human IFN- $\gamma$  or IL-4 and IL-13 added if indicated. For J774 macrophage the cells  
293 were seeded in 96-well plates at 50,000 per well overnight with 100 U/ml mouse IFN- $\gamma$  added if  
294 indicated. *Salmonella* in RPMI were added onto seeded cells at a multiplicity of infection (MOI)  
295 of approximately 20:1 and centrifuged for 10 minutes at 1000rpm to maximize cell contact.  
296 After centrifuging the samples were incubated at 37°C and 5% CO<sub>2</sub> (time 0). After 30 minutes,  
297 cells were washed three times with PBS followed by fresh media containing 100  $\mu$ g/ml  
298 gentamicin to kill extracellular *Salmonella*. At 2 hours the media was replaced with media  
299 containing gentamicin at 10  $\mu$ g/ml. At timepoints, intracellular bacteria were recovered using  
300 PBS containing 1% Triton X-100 and vigorous pipetting. Samples were serially diluted and five  
301 10 $\mu$ l spots were plated for CFU counting. Each sample included three separate wells as  
302 technical replicates (a total of 15 x 10 $\mu$ l spots counted per biological replicate).

303

#### 304 *Fluorescence microscopy*

305 Fluorescence microscopy was conducted similarly to the macrophage survival assay with  
306 some exceptions: Cells were seeded in 24-well plates containing glass coverslips at 125,000 per  
307 well. Bacteria were infected at an MOI of approximately 100 to maximize the instances of  
308 macrophage containing bacteria. At timepoints the media was removed and cells were washed  
309 three times with PBS. They were then fixed for 10 minutes at room temperature in PBS + 4%  
310 paraformaldehyde (PFA). Following three more PBS washes the cells were permeabilized for 10  
311 minutes in PBS + 0.2% Triton X-100 + 1% BSA. Coverslips were washed again, mounted on slides  
312 using 3 $\mu$ l mounting media containing DAPI and allowed to dry overnight in the dark. Slides

313 where viewed using a Zeiss Observer.z1 microscope using a 100x oil immersion objective and  
314 the Zeiss Zen microscopy software. Images were taken with a Zeiss Axiocam 506 mono camera  
315 mounted on the microscope. For all samples a 2s exposure was used for mCherry and 1s  
316 exposure for sfGFP. ImageJ software was employed for quantification to calculate fluorescence  
317 intensities in the red and green channels relative to a neighbouring background region for each  
318 bacterium and a GFP/mCherry ratio was generated.

319

## 320 **Acknowledgements**

321 We would sincerely like to thank Dr. Scott Gray-Owen and members of his lab, in  
322 particular Dr. Ryan Gaudet, for their generous donation of technical expertise, macrophage  
323 cells lines, and use of their equipment. WWN was supported by an Operating Grant from the  
324 Canada Institutes for Health Research (MOP-86683) and a Natural Sciences and Engineering  
325 Research Council (NSERC) of Canada Grant (RGPIN 386286-10). SJH was supported by an NSERC  
326 Vanier Canada Graduate Scholarship.

327

328

## 329 **References**

- 330 1. **Hansen-Wester, I., and M. Hensel.** 2001. Salmonella pathogenicity islands encoding type III secretion  
331 systems. *Microbes Infect.* **3**:549-559. doi: S1286-4579(01)01411-3 [pii].
- 332 2. **Fields, P. I., R. V. Swanson, C. G. Haidaris, and F. Heffron.** 1986. Mutants of *Salmonella typhimurium*  
333 that cannot survive within the macrophage are avirulent. *Proc. Natl. Acad. Sci. U. S. A.* **83**:5189-  
334 5193.



- 335 3. **Bäumler, A. J., J. G. Kusters, I. Stojiljkovic, and F. Heffron.** 1994. Salmonella typhimurium loci  
336 involved in survival within macrophages. Infect. Immun. **62**:1623-1630.
- 337 4. **Bäumler, A. J., R. M. Tsolis, T. A. Ficht, and L. G. Adams.** 1998. Evolution of Host Adaptation in  
338 *Salmonella enterica*. Infect. Immun. **66**:4579-4587.
- 339 5. **Winter, S. E., P. Thiennimitr, M. G. Winter, B. P. Butler, D. L. Huseby, R. W. Crawford, J. M. Russell,**  
340 **C. L. Bevins, L. G. Adams, R. M. Tsolis, J. R. Roth, and A. J. Bäumler.** 2010. Gut inflammation  
341 provides a respiratory electron acceptor for Salmonella. Nature. **467**:426-429. doi:  
342 10.1038/nature09415 [doi].
- 343 6. **Thiennimitr, P., S. E. Winter, M. G. Winter, M. N. Xavier, V. Tolstikov, D. L. Huseby, T. Sterzenbach,**  
344 **R. M. Tsolis, J. R. Roth, and A. J. Bäumler.** 2011. Intestinal inflammation allows Salmonella to  
345 use ethanolamine to compete with the microbiota. Proc. Natl. Acad. Sci. U. S. A. **108**:17480-  
346 17485. doi: 10.1073/pnas.1107857108 [doi].
- 347 7. **Spiga, L., M. G. Winter, T. Furtado de Carvalho, W. Zhu, E. R. Hughes, C. C. Gillis, C. L. Behrendt, J.**  
348 **Kim, D. Chessa, H. L. Andrews-Polymenis, D. P. Beiting, R. L. Santos, L. V. Hooper, and S. E.**  
349 **Winter.** 2017. An Oxidative Central Metabolism Enables Salmonella to Utilize Microbiota-  
350 Derived Succinate. Cell Host & Microbe. **22**:291-301.e6. doi:  
351 <https://doi.org/10.1016/j.chom.2017.07.018>.
- 352 8. **Cordes, T., A. Michelucci, and K. Hiller.** 2015. Itaconic Acid: The Surprising Role of an Industrial  
353 Compound as a Mammalian Antimicrobial Metabolite. Annu. Rev. Nutr. **35**:451-473. doi:  
354 10.1146/annurev-nutr-071714-034243 [doi].
- 355 9. **Zhao, M., X. Lu, H. Zong, J. Li, and B. Zhuge.** 2018. Itaconic acid production in microorganisms.  
356 Biotechnol. Lett. **40**:455-464. doi: 10.1007/s10529-017-2500-5 [doi].
- 357 10. **McFadden, B. A., and S. Purohit.** 1977. Itaconate, an isocitrate lyase-directed inhibitor in  
358 *Pseudomonas indigofera*. J. Bacteriol. **131**:136-144.

- 359 11. Hoyt, J. C., E. F. Robertson, K. A. Berlyn, and H. C. Reeves. 1988. Escherichia coli isocitrate lyase:  
360 properties and comparisons. *Biochimica Et Biophysica Acta (BBA) - General Subjects*. **966**:30-35.  
361 doi: [http://dx.doi.org/10.1016/0304-4165\(88\)90125-0](http://dx.doi.org/10.1016/0304-4165(88)90125-0).
- 362 12. Michelucci, A., T. Cordes, J. Ghelfi, A. Pailot, N. Reiling, O. Goldmann, T. Binz, A. Wegner, A.  
363 Tallam, A. Rausell, M. Buttini, C. L. Linster, E. Medina, R. Balling, and K. Hiller. 2013. Immune-  
364 responsive gene 1 protein links metabolism to immunity by catalyzing itaconic acid production.  
365 *Proceedings of the National Academy of Sciences*. **110**:7820-7825.
- 366 13. Strelko, C. L., W. Lu, F. J. Dufort, T. N. Seyfried, T. C. Chiles, J. D. Rabinowitz, and M. F. Roberts.  
367 2011. Itaconic Acid Is a Mammalian Metabolite Induced during Macrophage Activation. *J. Am.*  
368 *Chem. Soc.* **133**:16386-16389. doi: 10.1021/ja2070889.
- 369 14. Naujoks, J., C. Tabeling, B. D. Dill, C. Hoffmann, A. S. Brown, M. Kunze, S. Kempa, A. Peter, H. J.  
370 Mollenkopf, A. Dorhoi, O. Kershaw, A. D. Gruber, L. E. Sander, M. Witzenrath, S. Herold, A.  
371 Nerlich, A. C. Hocke, I. van Driel, N. Suttorp, S. Bedoui, H. Hilbi, M. Trost, and B. Opitz. 2016.  
372 IFNs Modify the Proteome of Legionella-Containing Vacuoles and Restrict Infection Via IRG1-  
373 Derived Itaconic Acid. *PLoS Pathog.* **12**:e1005408. doi: 10.1371/journal.ppat.1005408 [doi].
- 374 15. Zhu, X., H. Lei, J. Wu, J. V. Li, H. Tang, and Y. Wang. 2014. Systemic responses of BALB/c mice to  
375 *Salmonella typhimurium* infection. *J. Proteome Res.* **13**:4436-4445. doi: 10.1021/pr500770x  
376 [doi].
- 377 16. Sasikaran, J., M. Ziemski, P. K. Zadora, A. Fleig, and I. A. Berg. 2014. Bacterial itaconate degradation  
378 promotes pathogenicity. *Nat Chem Biol.* **10**:371-377.
- 379 17. Eriksson, S., S. Lucchini, A. Thompson, M. Rhen, and J. C. Hinton. 2003. Unravelling the biology of  
380 macrophage infection by gene expression profiling of intracellular *Salmonella enterica*. *Mol.*  
381 *Microbiol.* **47**:103-118. doi: 3313 [pii].

- 382 18. **Srikumar, S., C. Kröger, M. Hébrard, A. Colgan, S. V. Owen, S. K. Sivasankaran, A. D. S. Cameron, K.**  
383 **Hokamp, and J. C. D. Hinton.** 2015. RNA-seq Brings New Insights to the Intra-Macrophage  
384 Transcriptome of *Salmonella* Typhimurium. *PLoS Pathog.* **11**:e1005262.
- 385 19. **Shi, L., J. N. Adkins, J. R. Coleman, A. A. Schepmoes, A. Dohnkova, H. M. Mottaz, A. D. Norbeck, S.**  
386 **O. Purvine, N. P. Manes, H. S. Smallwood, H. Wang, J. Forbes, P. Gros, S. Uzzau, K. D. Rodland,**  
387 **F. Heffron, R. D. Smith, and T. C. Squier.** 2006. Proteomic analysis of *Salmonella enterica*  
388 serovar typhimurium isolated from RAW 264.7 macrophages: identification of a novel protein  
389 that contributes to the replication of serovar typhimurium inside macrophages. *J. Biol. Chem.*  
390 **281**:29131-29140. doi: M604640200 [pii].
- 391 20. **Santiviago, C. A., M. M. Reynolds, S. Porwollik, S. H. Choi, F. Long, H. L. Andrews-Polymenis, and**  
392 **M. McClelland.** 2009. Analysis of pools of targeted *Salmonella* deletion mutants identifies novel  
393 genes affecting fitness during competitive infection in mice. *PLoS Pathog.* **5**:e1000477. doi:  
394 10.1371/journal.ppat.1000477 [doi].
- 395 21. **Haneda, T., Y. Ishii, H. Danbara, and N. Okada.** 2009. Genome-wide identification of novel genomic  
396 islands that contribute to *Salmonella* virulence in mouse systemic infection. *FEMS Microbiol.*  
397 *Lett.* **297**:241-249. doi: 10.1111/j.1574-6968.2009.01686.x [doi].
- 398 22. **Elder, J. R., K. L. Chiok, N. C. Paul, G. Haldorson, J. Guard, and D. H. Shah.** 2016. The *Salmonella*  
399 pathogenicity island 13 contributes to pathogenesis in streptomycin pre-treated mice but not in  
400 day-old chickens. *Gut Pathog.* **8**:16-016-0098-0. eCollection 2016. doi: 10.1186/s13099-016-  
401 0098-0 [doi].
- 402 23. **Espinoza, R. A., C. A. Silva-Valenzuela, F. A. Amaya, I. M. Urrutia, I. Contreras, and C. A. Santiviago.**  
403 2017. Differential roles for pathogenicity islands SPI-13 and SPI-8 in the interaction of  
404 *Salmonella Enteritidis* and *Salmonella Typhi* with murine and human macrophages. *Biol. Res.*  
405 **50**:5-017-0109-8. doi: 10.1186/s40659-017-0109-8 [doi].

- 406 24. **Rathman, M., M. D. Sjaastad, and S. Falkow.** 1996. Acidification of phagosomes containing  
407 *Salmonella typhimurium* in murine macrophages. *Infect. Immun.* **64**:2765-2773.
- 408 25. **Alpuche Aranda, C.M., J. A. Swanson, W. P. Loomis, and S. I. Miller.** 1992. *Salmonella typhimurium*  
409 activates virulence gene transcription within acidified macrophage phagosomes. *Proc. Natl.*  
410 *Acad. Sci. U. S. A.* **89**:10079-10083.
- 411 26. **Chakraborty, S., H. Mizusaki, and L. J. Kenney.** 2015. A FRET-based DNA biosensor tracks OmpR-  
412 dependent acidification of *Salmonella* during macrophage infection. *PLoS Biol.* **13**:e1002116.  
413 doi: 10.1371/journal.pbio.1002116 [doi].
- 414 27. **Tallam, A., T. M. Perumal, P. M. Antony, C. Jager, J. V. Fritz, L. Vallar, R. Balling, A. Del Sol, and A.**  
415 **Michelucci.** 2016. Gene Regulatory Network Inference of Immunoresponsive Gene 1 (IRG1)  
416 Identifies Interferon Regulatory Factor 1 (IRF1) as Its Transcriptional Regulator in Mammalian  
417 Macrophages. *PLoS One.* **11**:e0149050. doi: 10.1371/journal.pone.0149050 [doi].
- 418 28. **Jha, A. K., S. C. Huang, A. Sergushichev, V. Lampropoulou, Y. Ivanova, E. Loginicheva, K.**  
419 **Chmielewski, K. M. Stewart, J. Ashall, B. Everts, E. J. Pearce, E. M. Driggers, and M. N.**  
420 **Artyomov.** 2015. Network integration of parallel metabolic and transcriptional data reveals  
421 metabolic modules that regulate macrophage polarization. *Immunity.* **42**:419-430. doi:  
422 10.1016/j.immuni.2015.02.005 [doi].
- 423 29. **Mills, E. L., D. G. Ryan, H. A. Prag, D. Dikovskaya, D. Menon, Z. Zaslona, M. P. Jedrychowski, A. S. H.**  
424 **Costa, M. Higgins, E. Hams, J. Szpyt, M. C. Runtsch, M. S. King, J. F. McGouran, R. Fischer, B. M.**  
425 **Kessler, A. F. McGettrick, M. M. Hughes, R. G. Carroll, L. M. Booty, E. V. Knatko, P. J. Meakin,**  
426 **M. L. J. Ashford, L. K. Modis, G. Brunori, D. C. Sevin, P. G. Fallon, S. T. Caldwell, E. R. S. Kunji, E.**  
427 **T. Chouchani, C. Frezza, A. T. Dinkova-Kostova, R. C. Hartley, M. P. Murphy, and L. A. O'Neill.**  
428 2018. Itaconate is an anti-inflammatory metabolite that activates Nrf2 via alkylation of KEAP1.  
429 *Nature.* **556**:113-117. doi: 10.1038/nature25986 [doi].

- 430 30. **Jacobson, A., L. Lam, M. Rajendram, F. Tamburini, J. Honeycutt, T. Pham, W. Van Treuren, K. Pruss,**  
431 **S. R. Stabler, K. Lugo, D. M. Bouley, J. G. Vilches-Moure, M. Smith, J. L. Sonnenburg, A. S.**  
432 **Bhatt, K. C. Huang, and D. Monack.** 2018. A Gut Commensal-Produced Metabolite Mediates  
433 Colonization Resistance to Salmonella Infection. *Cell Host & Microbe*. **24**:296-307.e7. doi:  
434 <https://doi.org/10.1016/j.chom.2018.07.002>.
- 435 31. **Ricke, S. C.** 2003. Perspectives on the use of organic acids and short chain fatty acids as  
436 antimicrobials. *Ps*. **82**:632-639. doi: 10.1093/ps/82.4.632.
- 437 32. **Tannahill, G. M., A. M. Curtis, J. Adamik, E. Palsson-McDermott, A. F. McGettrick, G. Goel, C.**  
438 **Frezza, N. J. Bernard, B. Kelly, N. H. Foley, L. Zheng, A. Gardet, Z. Tong, S. S. Jany, S. C. Corr, M.**  
439 **Haneklaus, B. E. Caffrey, K. Pierce, S. Walmsley, F. C. Beasley, E. Cummins, V. Nizet, M. Whyte,**  
440 **C. T. Taylor, H. Lin, S. L. Masters, E. Gottlieb, V. P. Kelly, C. Clish, P. E. Auron, R. J. Xavier, and L.**  
441 **A. J. O'Neill.** 2013. Succinate is an inflammatory signal that induces IL-1 $\beta$  through HIF-1 $\alpha$ .  
442 *Nature*. **496**:238-242.
- 443 33. **Hammerer, F., J. H. Chang, D. Duncan, A. Castaneda Ruiz, and K. Auclair.** 2016. Small Molecule  
444 Restores Itaconate Sensitivity in *Salmonella enterica*: A Potential New Approach to Treating  
445 Bacterial Infections. *Chembiochem*. **17**:1513-1517. doi: 10.1002/cbic.201600078 [doi].
- 446 34. **Zou, S. B., S. J. Hersch, H. Roy, J. B. Wiggers, A. S. Leung, S. Buranyi, J. L. Xie, K. Dare, M. Ibba, and**  
447 **W. W. Navarre.** 2012. Loss of elongation factor P disrupts bacterial outer membrane integrity. *J.*  
448 *Bacteriol*. **194**:413-425.
- 449 35. **Datsenko, K. A., and B. L. Wanner.** 2000. One-step inactivation of chromosomal genes in *Escherichia*  
450 *coli* K-12 using PCR products. *Proc. Natl. Acad. Sci*. **97**:6640-6645.
- 451 36. **Schmieger, H.** 1971. A method for detection of phage mutants with altered transducing ability.  
452 *Molecular and General Genetics MGG*. **110**:378-381. doi: 10.1007/BF00438281.

- 453 37. **Cherepanov, P. P., and W. Wackernagel.** 1995. Gene disruption in *Escherichia coli*: TcR and KmR  
454 cassettes with the option of Flp-catalyzed excision of the antibiotic-resistance determinant.  
455 *Gene*. **158**:9-14. doi: [http://dx.doi.org/10.1016/0378-1119\(95\)00193-A](http://dx.doi.org/10.1016/0378-1119(95)00193-A).
- 456 38. **Gibson, D. G., L. Young, R. Chuang, J. C. Venter, C. A. Hutchison , and H. O. Smith.** 2009. Enzymatic  
457 assembly of DNA molecules up to several hundred kilobases. *Nat Meth*. **6**:343-345.
- 458 39. **Corcoran, C. P., D. Podkaminski, K. Papenfort, J. H. Urban, J. C. D. Hinton, and J. Vogel.** 2012.  
459 Superfolder GFP reporters validate diverse new mRNA targets of the classic porin regulator,  
460 MicF RNA. *Mol. Microbiol.* **84**:428-445. doi: [10.1111/j.1365-2958.2012.08031.x](https://doi.org/10.1111/j.1365-2958.2012.08031.x).
- 461 40. **Urban, J., and J. Vogel.** 2009. A green fluorescent protein (GFP)-based plasmid system to study post-  
462 transcriptional control of gene expression *in vivo*, p. 301-319. *In* A. Serganov (ed.), vol. 540.  
463 Humana Press.
- 464 41. **Cooper, C. A., K. Zhang, S. N. Andres, Y. Fang, N. A. Kaniuk, M. Hannemann, J. H. Brumell, L. J.**  
465 **Foster, M. S. Junop, and B. K. Coombes.** 2010. Structural and biochemical characterization of  
466 SrcA, a multi-cargo type III secretion chaperone in *Salmonella* required for pathogenic  
467 association with a host. *PLoS Pathog.* **6**:e1000751.
- 468 42. **Coombes, B. K., N. F. Brown, Y. Valdez, J. H. Brumell, and B. B. Finlay.** 2004. Expression and  
469 secretion of *Salmonella* pathogenicity island-2 virulence genes in response to acidification  
470 exhibit differential requirements of a functional type III secretion apparatus and SsaL. *J. Biol.*  
471 *Chem.* **279**:49804-49815. doi: [10.1074/jbc.M404299200](https://doi.org/10.1074/jbc.M404299200) [doi].

## Figures

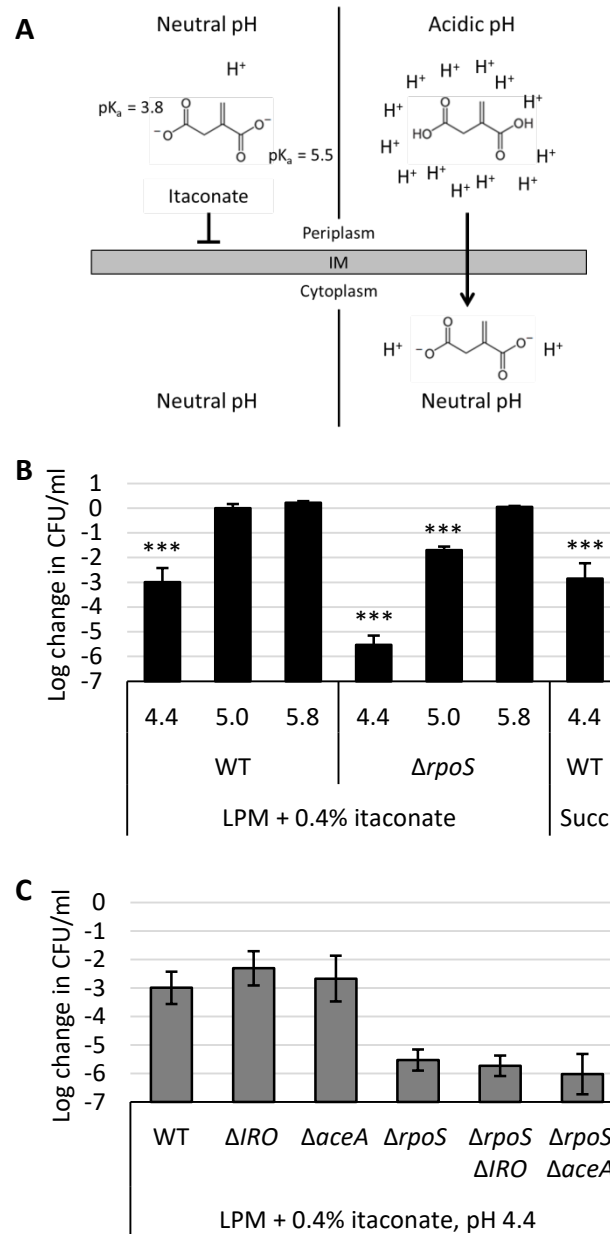

**Figure 1: Itaconate is bactericidal at low pH. A)** At neutral pH, the charges on itaconate inhibit diffusion across a lipid membrane (left). At acidic pH, itaconate protonates to itaconic acid, which can traverse the membrane (right). In the cytoplasm, itaconic acid dissociates and releases protons, trapping it in the cell and acidifying the cytoplasm. **B)** Survival (relative to 0h time point) of wild-type (WT) or *rpoS* mutant *Salmonella* after 3h in LPM media supplemented with 0.4% itaconate or succinate (Succ) and adjusted to pH 4.4, 5.0, or 5.8 as indicated. **C)** As in A but showing survival of *Salmonella aceA* and itaconate response operon (IRO) mutants in LPM + itaconate media at pH 4.4. All data are the average of at least three biological replicates and error bars show one standard deviation. A one-way ANOVA with Sidak's multiple comparison test was conducted comparing each sample to the same strain at pH 5.8 (B). WT in succinate was compared to WT at pH 5.8 in itaconate. Mutants in panel C were not significantly different than their parental strain (WT or  $\Delta rpoS$ ). \*\*\*,  $p < 0.001$ .

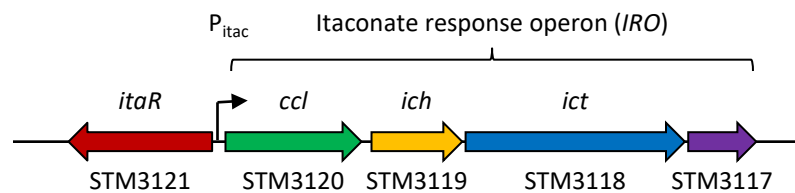

**Figure 2: Overview of the itaconate degradation operon (IRO) and the itaconate-responsive regulator, *itaR*.** *Salmonella* gene loci based on the genome of *Salmonella* Typhimurium LT2 are shown below. Identities of *ccl*, *ich*, and *ict* are shown above as previously reported(16). STM3117 appears to be encoded in the same operon however its function remains unknown. In this work we designate the names '*itaR*' for STM3121, 'itaconate response operon' (IRO) for STM3120-STM3117, and ' $P_{itac}$ ' for the IRO promoter.



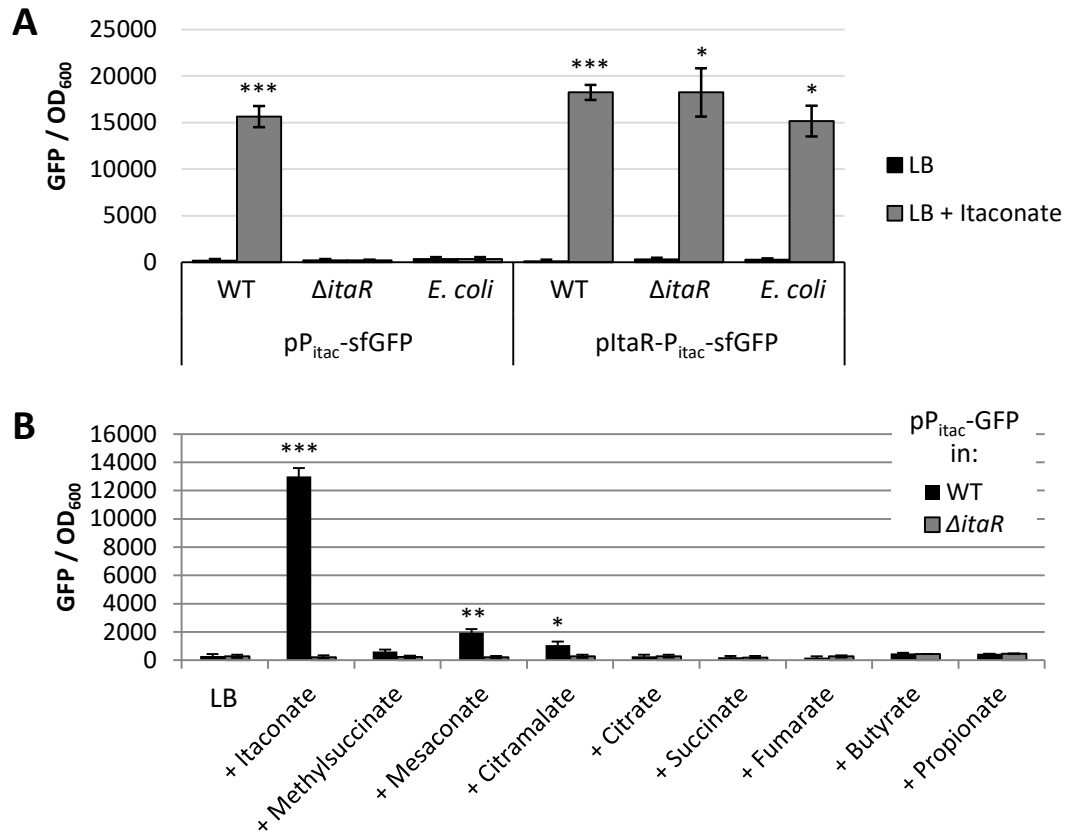

**Figure 3: ItaR is necessary and sufficient to induce  $P_{itac}$  expression in response to itaconate.** Expression of  $P_{itac}$ -sfGFP in wild-type (WT) or *itaR* knockout ( $\Delta itaR$ ) *Salmonella*, or in *E. coli*. Figures show GFP fluorescence normalized to optical density at 600nm ( $OD_{600}$ ) after 16h of growth in LB alone or supplemented with 0.2% itaconate (A) or similar metabolites (B). Data are the average of at least three biological replicates and error bars show one standard deviation. pP<sub>itac</sub>, plasmid-borne transcriptional fusion of  $P_{itac}$  to sfGFP; pItaR-P<sub>itac</sub>, pP<sub>itac</sub> with the *itaR* gene and its native promoter included on the plasmid. A Games-Howell ANOVA was conducted comparing with and without itaconate for each strain (A), or comparing WT to  $\Delta itaR$  (B) for each added metabolite. \*,  $p < 0.05$ ; \*\*,  $p < 0.01$ ; \*\*\*,  $p < 0.001$ .

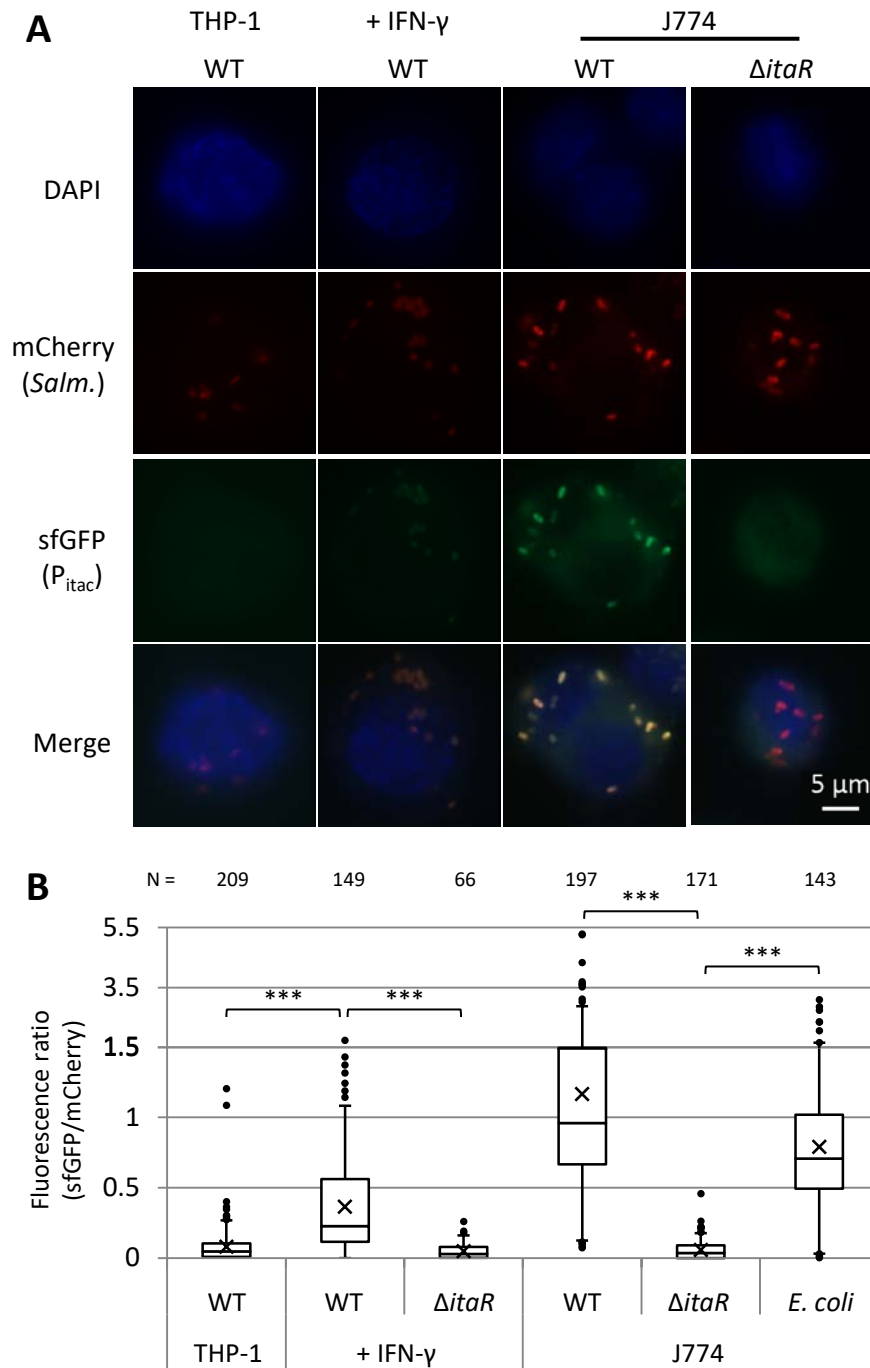

**Figure 4:  $P_{itac}$  is activated in J774 macrophage and THP-1 macrophage stimulated with IFN- $\gamma$ .**

Expression of  $P_{itac}$ -sfGFP in intracellular wild-type (WT) or *itaR* knockout ( $\Delta itaR$ ) *Salmonella* containing the pICM- $P_{itac}$  plasmid (constitutive mCherry expression). For expression in *E. coli*, the *itaR* gene was also encoded on the reporter plasmid. '+ IFN- $\gamma$ ' samples were pre-treated with human IFN- $\gamma$ . **A**) Representative fluorescence microscopy images. **B**) Relative fluorescence quantification of individual bacterial particles at 8h post-infection. Number of bacteria quantified is indicated above and totalled from at least two biological replicates ( $\geq 3$  for all WT *Salmonella* samples). Boxes indicate first and third quartiles; central line, median; X, mean; whiskers, 95<sup>th</sup> percentile; dots, all non-zero data points outside 95<sup>th</sup> percentile. The y-axis changes scale at 1.5 to better show outliers. A Games-Howell ANOVA was conducted comparing indicated samples. \*\*\*,  $p < 0.001$ .
